# Supplementary material for: Role of the epithelial-mesenchymal transition-related circular RNA, circ-10720, in non-small-cell lung cancer
Source: PubMed Central journal article supplement — Transl Lung Cancer Res. 2021 Apr;10(4):1804–18. doi: 10.21037/tlcr-20-920 (PMC8107756; doi:10.21037/tlcr-20-920), 2021-04
Supplement: tlcr-10-04-1804-dss.pdf [file tlcr-10-04-1804-dss.pdf]

## Data Sharing Statement

|                     |                                                                                                                                                     |                                                                                                                                                                   |
|---------------------|-----------------------------------------------------------------------------------------------------------------------------------------------------|-------------------------------------------------------------------------------------------------------------------------------------------------------------------|
| <b>Article Info</b> | <a href="http://dx.doi.org/10.21037/tlcr-20-920">http://dx.doi.org/10.21037/tlcr-20-920</a>                                                         |                                                                                                                                                                   |
| <b>Item</b>         | <b>Question</b>                                                                                                                                     | <b>Authors' Response<br/>(place "-" if not applicable)</b>                                                                                                        |
| 1                   | Would you like to share data collected for your study to others?                                                                                    | YES                                                                                                                                                               |
| 2                   | If not, would you like to share the reason for your decision?                                                                                       | -                                                                                                                                                                 |
| 3                   | What data in particular will be shared?                                                                                                             | The survival data and the circ-10720 levels in particular. Other information requested related with the study will be considered under appropriate justification. |
| 4                   | Any other documents will be shared? Such as study protocol, statistical analysis plan, informed consent form, clinical study report, analytic code. | Informed consent form will also be shared if requested.                                                                                                           |
| 5                   | When will data availability begin?                                                                                                                  | From the publication date.                                                                                                                                        |
| 6                   | When will data availability end?                                                                                                                    | Two years within the publication date, since the technique or survival date may be updated over time.                                                             |
| 7                   | To whom will you share the data?                                                                                                                    | To anyone interested in the study.                                                                                                                                |
| 8                   | For what type of analysis or purpose?                                                                                                               | To analyze circ-10720 impact on time to relapse of NSCLC patients.                                                                                                |
| 9                   | How or where can the data/documents be obtained?                                                                                                    | Emails could be sent to the address below to obtain the shared data:<br>anavarroponz@ub.edu                                                                       |
| 10                  | Any other restrictions?                                                                                                                             | We may balance the potential benefits and risks for each request and then provide the data that could be shared.                                                  |
