# Supplementary material for: Role of the epithelial-mesenchymal transition-related circular RNA, circ-10720, in non-small-cell lung cancer
Source: PubMed Central journal article supplement — Transl Lung Cancer Res. 2021 Apr;10(4):1804–18. doi: 10.21037/tlcr-20-920 (PMC8107756; doi:10.21037/tlcr-20-920), 2021-04
Supplement: tlcr-10-04-1804-supplementary.pdf [file tlcr-10-04-1804-supplementary.pdf]

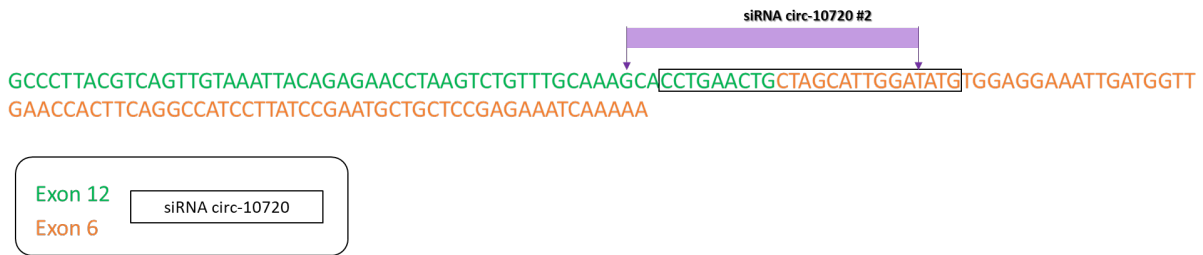

**Figure S1** Figure showing the position of the different designed dsRNAs used in the present study to silence circ-10720 expression. A fragment of exon 12 and exon 6 from *CUL2* gene is shown, in the position where is produced the binding of both exons during circularization of circ-10720.

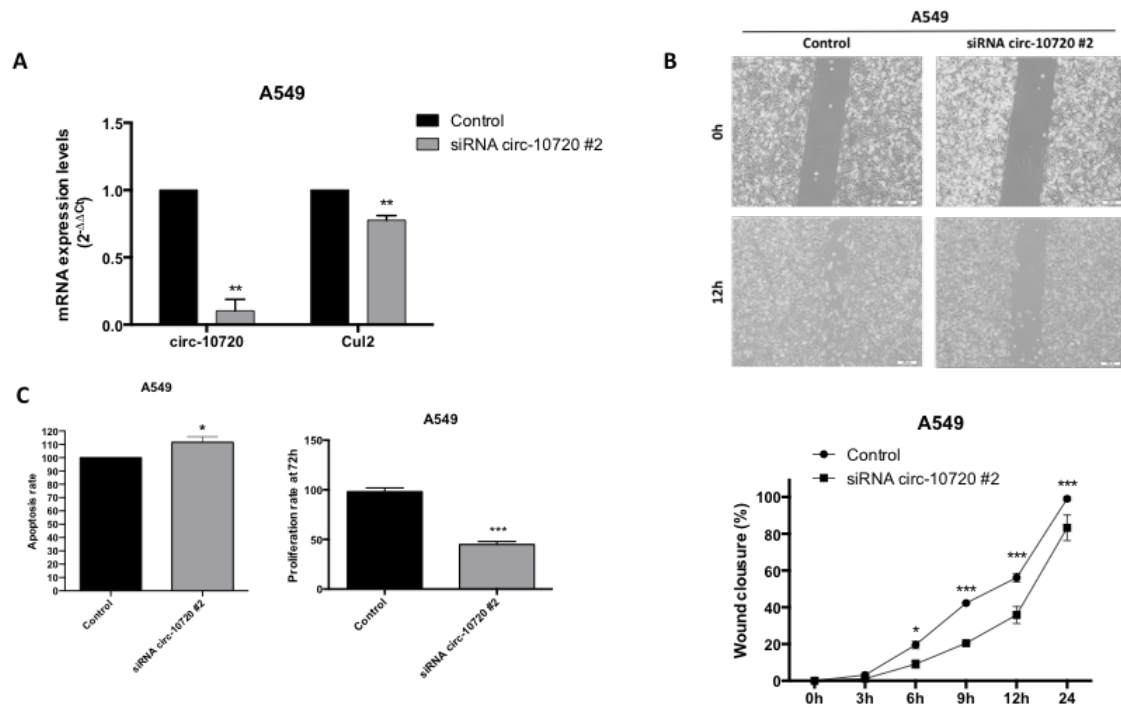

**Figure S2** Validation of key experiments in A549 using siRNA circ-10720 #2. (A) circ-10720 and *CUL2* mRNA expression in control *vs.* siRNA cells. (B) Migration assay. (C) Apoptosis and proliferation assay.

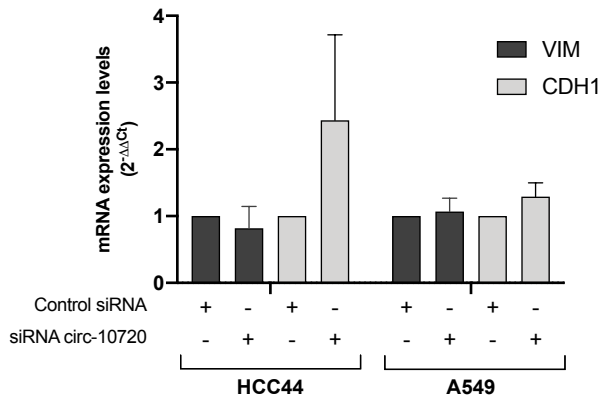

**Figure S3** mRNA expression levels of VIM and CDH1 after silencing circ-10720. VIM, Vimentin; CDH1, E-cadherin.

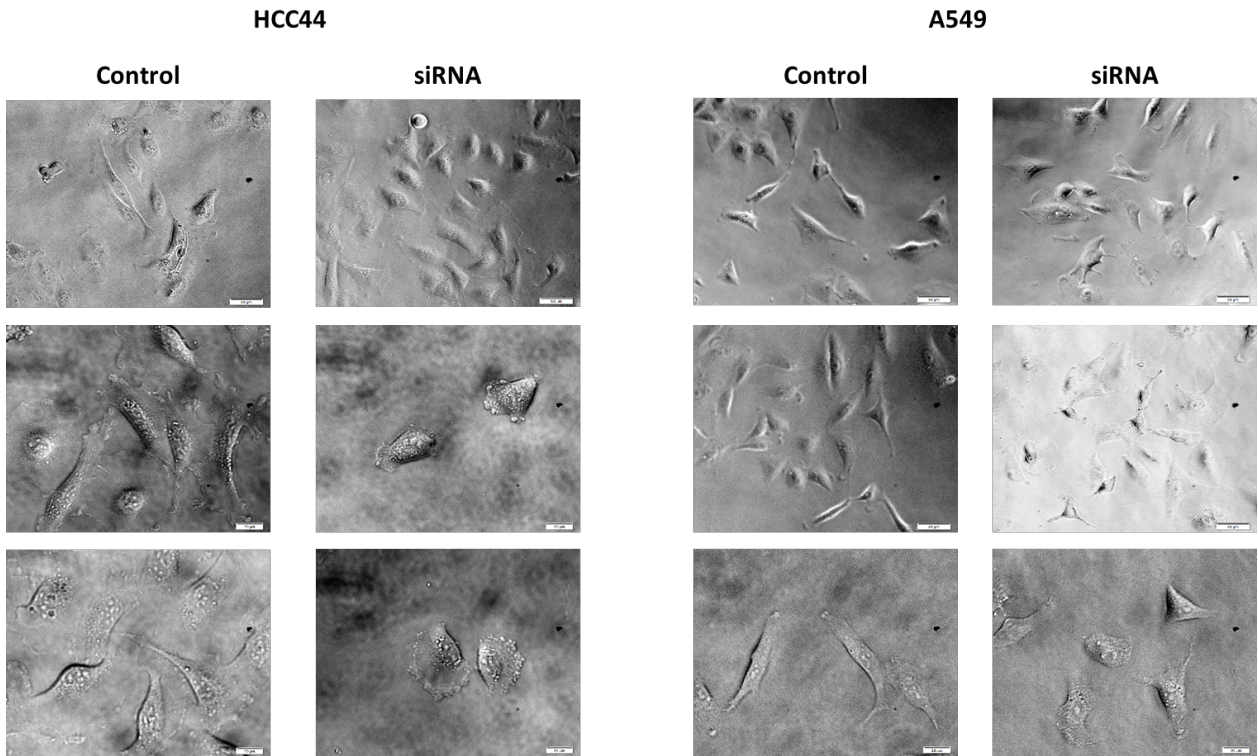

**Figure S4** Bright field images to observe morphological changes of control or circ-10720 silenced HCC44 (left panel) and A549 (right panel) cell lines.

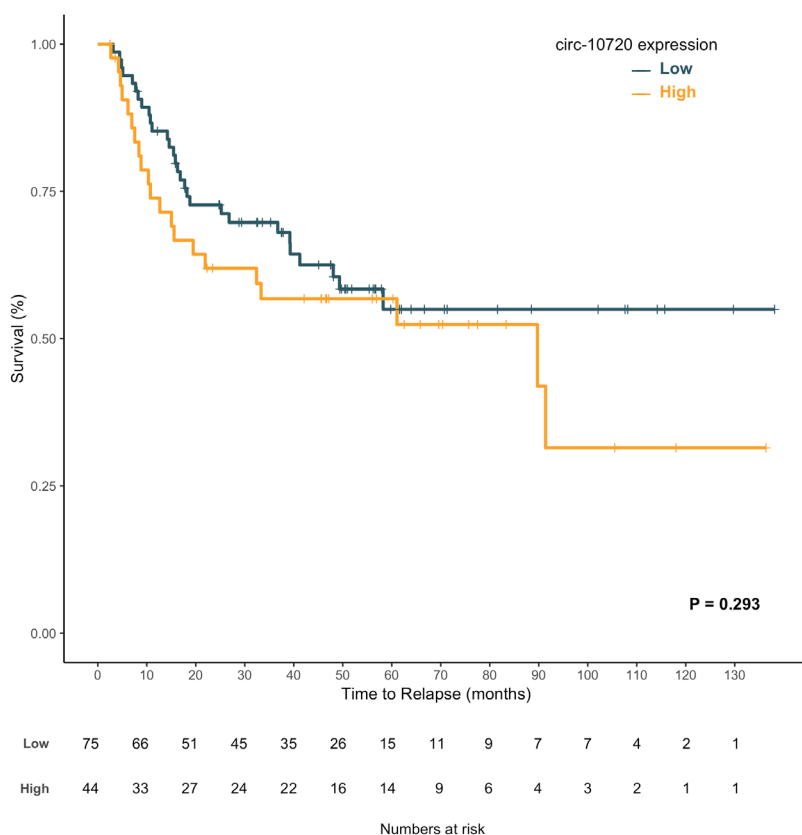

**Figure S5** TTR analysis in the whole cohort (n=119) according circ-10720 levels. TTR, time to relapse.

**Table S1** DsiRNAs sequences used in the study

| Circ-10720 dsiRNAs  | Strand    | Sequence                       |
|---------------------|-----------|--------------------------------|
| siRNA circ-10720    | Sense     | 5'-CAUAUCCAAUGCUAGCAGUUCAGG-3' |
|                     | AntiSense | 5'-CCUGAACUGCUAGCAUUGGAUAUG-3' |
| siRNA circ-10720 #2 | Sense     | 5'-CUGAACUGCUAGCAUUGGAUAUGU-3' |
|                     | AntiSense | 5'-ACAUAUCCAAUGCUAGCAGUUCAG-3' |

**Table S2** Main clinical characteristics of patients not receiving adjuvant treatment (n=83)

| Characteristics | Value                   | N=83 (%)     | TTR, P value |
|-----------------|-------------------------|--------------|--------------|
| Sex             | Male                    | 65 (78.3)    | 0.379        |
|                 | Female                  | 18 (21.7)    |              |
| Age, yrs        | Mean [range]            | 67 [51–77]   | 0.203        |
|                 | ≤65                     | 33 (39.8)    |              |
|                 | >65                     | 50 (60.2)    |              |
| ECOG PS         | 0                       | 21 (25.3)    | 0.927        |
|                 | 1                       | 62 (74.7)    |              |
| Stage           | I                       | 67 (80.7)    | 0.078        |
|                 | II                      | 9 (10.8)     |              |
|                 | III                     | 7 (8.4)      |              |
| Histology       | ADK                     | 43 (51.8)    | 0.948        |
|                 | SCC                     | 35 (42.2)    |              |
|                 | Adenosquamous carcinoma | 1 (1.2)      |              |
|                 | Large cell carcinoma    | 1 (1.2)      |              |
|                 | Neuroendocrine          | 2 (2.4)      |              |
|                 | Sarcomatoid             | 1 (1.2)      |              |
|                 |                         |              |              |
| Smoking history | Current smoker          | 30 (36.2)    | 0.934        |
|                 | Former smoker           | 44 (53)      |              |
|                 | Never smoker            | 9 (10.8)     |              |
| Type of surgery | Lobectomy               | 66 (79.5)    | 0.946        |
|                 | Pneumonectomy           | 5 (6.0)      |              |
|                 | Atypical resection      | 5 (6.0)      |              |
|                 | Anatomical resection    | 7 (8.5)      |              |
| Relapse         | No                      | 51 (61.4)    | –            |
|                 | Yes                     | 32 (38.6)    |              |
| Mutation status | TP53 mutation           | 25/62 (40.3) | 0.004        |
|                 | KRAS mutation           | 12/71 (16.9) |              |

TTR, time to relapse; ECOG PS, Eastern Cooperative Oncology Group performance status; ADK, adenocarcinoma; SCC, squamous cell carcinoma.
